# Supplementary material for: Antimicrobial resistance in human and animal pathogens in Zambia, Democratic Republic of Congo, Mozambique and Tanzania: an urgent need of a sustainable surveillance system
Source: PubMed Central journal article supplement (PMC3852305; doi:10.1186/1476-0711-12-28), 2013-10-12
Supplement: 1476-0711-12-28-S1.pdf [file 1476-0711-12-28-S1.pdf]

Supplementary Table 1: Showing Methodology used for susceptibility testing, population sampled and specimens collected in various studies

| Ref | Authors             | Population                    | Specimens       | Community/Hospital                        | Method of susceptibility | Guideline                            | Control Strains |
|-----|---------------------|-------------------------------|-----------------|-------------------------------------------|--------------------------|--------------------------------------|-----------------|
| 12  | Festo et al         | Children 370                  | Urine           | Hospital                                  | Disc diffusion           | CLSI                                 | Stated          |
| 13  | Msaki et al         | Children 231                  | Urine           | Community/ Outpatients                    | Disc diffusion           | CLSI                                 | Stated          |
| 14  | Massinde et al      | Pregnant women                | Urine           | Hospital                                  | Disc diffusion           | CLSI                                 | Stated          |
| 15  | Lyamuya et al       | Diabetic women                | Urine           | Hospital                                  | Disc diffusion           | CLSI                                 | Stated          |
| 17  | Moyo et al          | Children 153,<br>Adults 117   | Urine           | 82 outpatients, 188<br>inpatients         | Disc diffusion           | CLSI                                 | Stated          |
| 20  | Rimoy et al         | Adults and<br>children        | Urine           | 126 outpatients, 274<br>inpatients        | Disc diffusion           | CLSI                                 | Not stated      |
| 21  | Bloomberg et<br>al  | Pregnant women<br>5153        | Urine           | *Outpatients                              | Disc diffusion           | CLSI                                 | Stated          |
| 22  | Bloomberg           | 1798 children                 | Blood           | *Hospital                                 | Disc diffusion           | CLSI                                 | Stated          |
| 23  | Kayange et al       | 300 neonates                  | Blood           | Hospital                                  | Disc diffusion           | CLSI                                 | Stated          |
| 24  | Bloomberg et<br>al  | Adults/children               | Blood/urine/pus | *Inpatients/Outpatients; 2<br>year period | Disc diffusion           | CLSI                                 | Stated          |
| 25  | Moyo                | 5151 Children,<br>1855 adults | Blood           | Hospital                                  | Disc diffusion           | CLSI                                 | Stated          |
| 26  | Mandomando<br>et al | Children 19896                | Blood           | *Hospital; 5 year period                  | Disc diffusion           | CLSI                                 | Stated          |
| 27  | Bloomberg et<br>al  | Children 1787                 | Blood           | Community and Hospital                    | Disc diffusion           | CLSI                                 | Stated          |
| 32  | Muyembe et al       | Adult/Children                | Blood           | Hospitals                                 | Disc diffusion           | Not stated                           | Not stated      |
| 33  | Lunguya et al       | Adult/children                | Blood           | Hospital                                  | VITEK/E-test             | EUCAST                               | Stated          |
| 37  | Meremo et al        | Febrile Adults                | Blood           | Hospital                                  | Disc diffusion           | CLSI                                 | Stated          |
| 40  | Mwansa et al        | Adults                        | Stool           | -                                         | Disc diffusion           | Not stated                           | Stated          |
| 41  | Sosa et al          | Adults                        | Stool           | Not stated                                | Not stated               | Not stated                           | Not stated      |
| 42  | Lunguya O et al     | Adults/Children               | Stool           | Community                                 | Disc diffusion           | French<br>society of<br>Microbiology | Stated          |
| 43  | Temu et al          | Adults/Children               | Stool           | Inpatients/Outpatients                    | Disc diffusion           | CLSI                                 | Stated          |
| 44  | Mandomando<br>et al | Children                      | Stool           | Hospital                                  | Disc diffusion           | CLSI                                 | Stated          |

Supplementary Table 1: Showing Methodology used for susceptibility testing, population sampled and specimens collected in various studies

|    |                    |                  |            |                    |                       |                                 |            |
|----|--------------------|------------------|------------|--------------------|-----------------------|---------------------------------|------------|
| 45 | Cavallo et al      | Adults           | Stool      | Camps              | MIC                   | Not stated                      | Not stated |
| 47 | Mwansa et al       | Adults/Children  | Stool      | Outbreaks          | Disc diffusion        | CLSI                            | Stated     |
| 48 | Urassa et al       | Adults/Children  | Stool      | Outbreaks          | Disc diffusion        | Not stated                      | Stated     |
| 49 | Ansaruzzaman et al | Adults/children  | Stool      | Community          | Not stated            | Not stated                      | Not stated |
| 51 | Mubita et al       | Adults/children  | Stool      | -                  | Disc diffusion        | Not Stated                      | Not stated |
| 52 | Rajji et al        | Adults/Children  | Stool      | Hospital/community | Disc diffusion        | Not stated                      | Not Stated |
| 54 | Mandomando et al   | Children         | Stool      | Community          | Disc diffusion        | Not Stated                      | Not Stated |
| 57 | Mdegela et al      | Human/Chickens   | Stool      | Community          | Disc diffusion        | Not stated                      | Not stated |
| 61 | Mawalla et al      | Adults           | Pus        | Hospital           | Disc diffusion        | CLSI                            | Stated     |
| 66 | Urassa et al       | Adults           | Pus        | Hospital           | Disc diffusion/E-test | CLSI                            | Stated     |
| 67 | Mshana et al       | Adults           | Pus        | Hospital           | Disc diffusion        | CLSI                            | Stated     |
| 68 | Kapatamoyo et al   | Adults           | Pus        | Hospital           | Disc diffusion        | CLSI                            | Not stated |
| 69 | Schaumburg et al   | Human/Chimpanzee | Pus/others | Community          | Disc diffusion        | CLSI                            | Stated     |
| 70 | Takaisi et al      | Adults           | Pus        | Hospital           | Disc diffusion        | French Society for Microbiology | Stated     |
| 71 | Nyembwe et al      | Adults           | Pus/others | Hospital           | Disc diffusion        | French Society for Microbiology | Stated     |
| 59 | Nonga et al        | Domestic duck    | Intestines | NA                 | Disc diffusion        | Not stated                      | Not stated |
| 73 | Ngoma et al        | Cattle/pigs      |            | NA                 | MIC using gar         | Not stated                      | Not stated |
| 76 | Hang'ombe et al    | eggs             | Eggs       | NA                 | Disc diffusion        | CLSI                            |            |
| 77 | Iqbal et al        | Birds            | intestines | NA                 | Disc diffusion        | CLSI                            | Not stated |

\*Surveillance studies, NA: Not applicable,
